# Supplementary material for: Child maltreatment, early life socioeconomic disadvantage and all-cause mortality in mid-adulthood: findings from a prospective British birth cohort
Source: PubMed Central journal article supplement (PMC8461284; doi:10.1136/bmjopen-2021-050914), 2021-09-22
Supplement: bmjopen-2021-050914supp001.pdf [file bmjopen-2021-050914supp001.pdf]

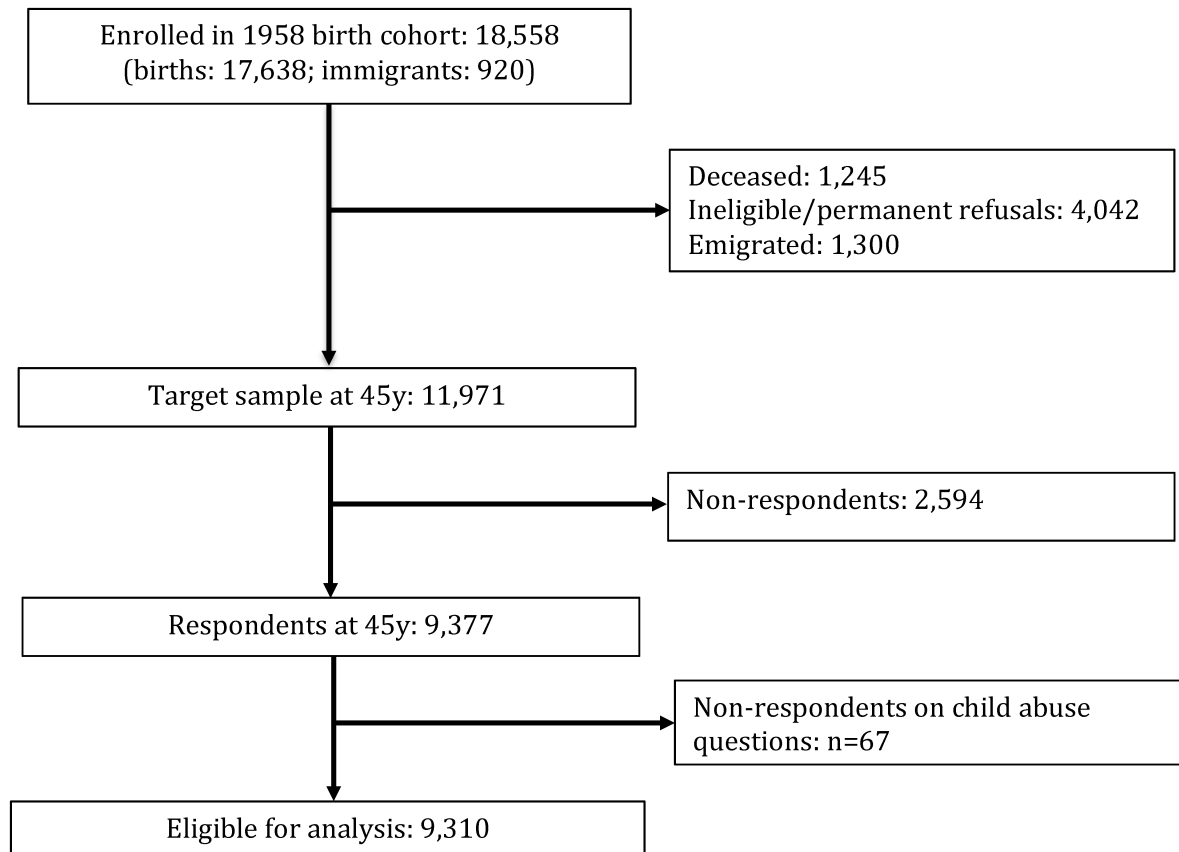

**Supplementary Figure 1: Flow diagram of participants from birth who were eligible to be included in analytical sample**
