# Supplementary material for: Child maltreatment, early life socioeconomic disadvantage and all-cause mortality in mid-adulthood: findings from a prospective British birth cohort
Source: PubMed Central journal article supplement (PMC8461284; doi:10.1136/bmjopen-2021-050914), 2021-09-22
Supplement: bmjopen-2021-050914supp002.pdf [file bmjopen-2021-050914supp002.pdf]

**Supplementary tables**

Table S1. Distribution of potential intermediary variables (observed values)

| Intermediary variables                   | N(%) | Mean(SD) |
|------------------------------------------|------|----------|
| <b>Socioeconomic</b>                     |      |          |
| 33y social class <sup>a</sup>            |      |          |
| I/II                                     | 3757 | (42.2)   |
| III non-manual                           | 1938 | (21.8)   |
| III manual                               | 1727 | (19.4)   |
| IV/V                                     | 1476 | (16.6)   |
| 33y educational qualifications           |      |          |
| None                                     | 1765 | (21.8)   |
| O-levels                                 | 2797 | (34.5)   |
| A-levels                                 | 2424 | (29.9)   |
| Degree                                   | 1123 | (13.9)   |
| <b>Behavioural</b>                       |      |          |
| 42y smoking                              |      |          |
| Never                                    | 4127 | (45.8)   |
| Ex-smoker                                | 2709 | (30.1)   |
| Current                                  | 2180 | (24.2)   |
| 45y problem drinking                     |      |          |
| Low risk                                 | 6262 | (72.9)   |
| Risky/hazardous behaviour                | 1981 | (23.1)   |
| High risk                                | 213  | (2.48)   |
| Almost certainly dependent               | 131  | (1.53)   |
| 42y illegal drug use <sup>e</sup>        | 230  | (2.56)   |
| <b>Adiposity</b>                         |      |          |
| 45y obesity                              | 2269 | (24.5)   |
| 45y waist-hip ratio                      | 0.87 | (0.09)   |
| <b>Mental health</b>                     |      |          |
| 42y psychological distress <sup>*€</sup> | 2    | (0,4)    |

---

**Cardio-metabolic factors<sup>β</sup>**

|                                                  |               |
|--------------------------------------------------|---------------|
| 45y glycated haemoglobin (mmol/L)                | 5.25 (0.69)   |
| 45y triglycerides (mmol/L)*                      | 1.6 (1.1,2.5) |
| 45y low-density lipoprotein cholesterol (mmol/L) | 3.45 (0.93)   |

---

N varies due to missing data. <sup>α</sup>classes I and II (professional/managerial), class III non-manual (skilled non-manual), class III manual (skilled manual) and classes IV and V (partly/unskilled manual); <sup>ε</sup>use of ecstasy, amphetamines, LSD, popper, magic mushrooms, cocaine, temazepan, crack, ketamine, heroin or methadone in last 12 months; \*median(inter-quartile range); <sup>ε</sup>assessed using the malaise inventory (see Geoffroy et al. PLoS One 2013;8(11) for details); <sup>β</sup>all adjusted for medications (see Li et al. BMJ Open 2019;9(3) for details)

Table S2. Potential intermediary variables and sex-adjusted risk of all-cause mortality (44/45y to 58y; N=9310)

| Intermediary variable                            | HR (95%CI)       |
|--------------------------------------------------|------------------|
| <b>Socioeconomic</b>                             |                  |
| 33y social class <sup>a</sup>                    | 1.21(1.09,1.34)  |
| 33y educational qualifications <sup>a</sup>      | 1.28(1.16,1.41)  |
| <b>Behavioural</b>                               |                  |
| 42y smoking <sup>a</sup>                         | 3.01(2.32,3.89)  |
| 45y problem drinking <sup>a</sup>                | 3.04(1.65,5.62)  |
| 42y illegal drug use                             | 2.59(1.62,4.14)  |
| <b>Adiposity</b>                                 |                  |
| 45y obesity                                      | 1.38(1.08, 1.75) |
| 45y waist-hip ratio <sup>b</sup>                 | 2.32(0.44,12.2)  |
| <b>Mental health</b>                             |                  |
| 42y mental health <sup>c</sup>                   | 1.11(1.07,1.15)  |
| <b>Cardio-metabolic factors</b>                  |                  |
| 45y glycated haemoglobin (mmol/L)                | 1.02(1.01,1.03)  |
| 45y triglycerides (mmol/L)                       | 1.00(1.00,1.01)  |
| 45y low-density lipoprotein cholesterol (mmol/L) | 1.00(1.00,1.01)  |

<sup>a</sup>For categorical variables, extreme category groups are compared (e.g.: lowest vs highest (reference group) social class);

<sup>b</sup>per 0.01 unit increase in waist/hip ratio; <sup>c</sup> per increase on 15-point malaise scale

Table S3. Hazard ratios (95% confidence intervals) for early-life adversities in relation to all-cause mortality in 1958 birth cohort participants aged 44/45y to 58y, men and women separately (N=9310)

|                            | Model 1           | Model 2           | Model 3           |
|----------------------------|-------------------|-------------------|-------------------|
|                            | HR (95%CI)        | HR (95%CI)        | HR (95%CI)        |
| <b>Men</b>                 |                   |                   |                   |
| Socioeconomic disadvantage | 1.89 (1.26,2.84)  | 1.85 (1.22,2.78)  | 1.69 (1.12,2.57)  |
| Neglect                    | 1.81 (1.22,2.70)  | 1.49 (0.97,2.30)  | 1.45 (0.94,2.23)  |
| Physical abuse             | 2.16 (1.36,3.45)  | 2.01 (1.25,3.23)  | 1.81 (1.00,3.29)  |
| Psychological abuse        | 1.54 (0.98,2.40)  | 1.46 (0.93,2.28)  | 0.95 (0.54,1.68)  |
| Witnessing abuse           | 1.82 (1.04,3.21)  | 1.66 (0.94,2.95)  | 1.13 (0.58,2.22)  |
| Sexual abuse               | 5.41 (2.01,14.58) | 5.51 (2.01,15.07) | 4.37 (1.53,12.47) |
| <b>Women</b>               |                   |                   |                   |
| Socioeconomic disadvantage | 2.60 (1.76,3.85)  | 2.44 (1.64,3.63)  | 2.23 (1.49,3.34)  |
| Neglect                    | 1.59 (0.98,2.57)  | 1.49 (0.89,2.48)  | 1.41 (0.84,2.35)  |
| Physical abuse             | 2.57 (1.60,4.12)  | 2.33 (1.44,3.78)  | 1.67 (0.85,3.28)  |
| Psychological abuse        | 1.73 (1.14,2.61)  | 1.66 (1.09,2.51)  | 1.02 (0.58,1.79)  |
| Witnessing abuse           | 2.03 (1.27,3.26)  | 1.92 (1.19,3.10)  | 1.17 (0.64,2.14)  |
| Sexual abuse               | 3.80 (2.15,6.73)  | 3.21 (1.79,5.75)  | 2.30 (1.18,4.49)  |

Adjustments as in Figure 1 footnotes.

Table S4. Correlation between early-life adversities (using Cramér's phi, observed data)

|                            | Socioeconomic disadvantage | Neglect | Physical abuse | Psychological abuse | Witnessing abuse | Sexual abuse |
|----------------------------|----------------------------|---------|----------------|---------------------|------------------|--------------|
| Socioeconomic disadvantage |                            | 0.11    | 0.04           | 0.05                | 0.07             | 0.05         |
| Neglect                    |                            |         | 0.07           | 0.04                | 0.07             | 0.04         |
| Physical abuse             |                            |         |                | 0.50                | 0.44             | 0.21         |
| Psychological abuse        |                            |         |                |                     | 0.39             | 0.22         |
| Witnessing abuse           |                            |         |                |                     |                  | 0.25         |
| Sexual abuse               |                            |         |                |                     |                  |              |

Table S5. Proportion of missing data (ascending order) in sample and distribution of observed and imputed analysis samples

| Variable                            | Missing N(%) | Data distribution         |                           |
|-------------------------------------|--------------|---------------------------|---------------------------|
|                                     |              | Observed sample<br>%/Mean | Imputed sample*<br>%/Mean |
| Sex                                 | 0 (0)        |                           |                           |
| Males                               |              | 49.6                      | 49.6 <sup>€</sup>         |
| Females                             |              | 50.4                      | 50.4 <sup>€</sup>         |
| Psychological abuse                 | 0 (0)        | 10.7                      | 10.7 <sup>€</sup>         |
| Physical abuse                      | 2 (0.02)     | 6.04                      | 6.04                      |
| Sexual abuse                        | 2 (0.02)     | 1.60                      | 1.60                      |
| Witnessing abuse                    | 2 (0.02)     | 6.01                      | 6.01                      |
| 45y obesity                         | 61 (0.66)    | 24.5                      | 24.6                      |
| 45y waist-to-hip ratio              | 64 (0.69)    | 0.87                      | 0.87                      |
| Social class <sup>α</sup> at birth  | 277 (2.98)   |                           |                           |
| I/II                                |              | 19.1                      | 19.1                      |
| III non-manual                      |              | 10.0                      | 10.0                      |
| III manual                          |              | 48.7                      | 48.7                      |
| IV/V/No male head                   |              | 22.2                      | 22.2                      |
| 42y smoking                         | 294 (3.16)   |                           |                           |
| Never                               |              | 45.8                      | 45.7                      |
| Ex                                  |              | 30.1                      | 30.0                      |
| Current                             |              | 24.2                      | 24.3                      |
| 42y Malaise inventory               | 332 (3.57)   | 2.46                      | 2.47                      |
| 42y Illegal drug use                | 335 (3.60)   | 2.56                      | 2.60                      |
| 33y Adult social class <sup>α</sup> | 412 (4.43)   |                           |                           |
| I/II                                |              | 42.2                      | 41.7                      |
| III non-manual                      |              | 21.8                      | 21.7                      |
| III manual                          |              | 19.4                      | 19.5                      |
| IV/V                                |              | 16.6                      | 17.1                      |
| Maternal age at birth (years)       | 496 (5.33)   | 27.5                      | 27.5                      |
| 45y Problem drinking                | 723 (7.77)   |                           |                           |
| Low risk                            |              | 72.9                      | 73.2                      |
| Risky/hazardous behaviour           |              | 23.1                      | 22.8                      |
| High risk                           |              | 2.48                      | 2.47                      |

|                                                               |                                  |       |       |
|---------------------------------------------------------------|----------------------------------|-------|-------|
| Almost certainly dependent                                    |                                  | 1.53  | 1.52  |
| Child neglect                                                 | 850 (9.13)                       | 10.4  | 10.5  |
| 7y physical or cognitive impairment                           | 1128 (12.1)                      | 4.40  | 4.72  |
| Birth order                                                   | 1150 (12.4)                      |       |       |
|                                                               | 1 <sup>st</sup> born             | 38.5  | 38.8  |
|                                                               | 2 <sup>nd</sup> -4 <sup>th</sup> | 54.4  | 54.0  |
|                                                               | 5th or more                      | 7.17  | 7.18  |
| 7y tenure                                                     | 1161 (12.5)                      |       |       |
|                                                               | Owner occupied                   | 44.6  | 44.8  |
|                                                               | Council rented                   | 37.6  | 37.5  |
|                                                               | Private rented                   | 11.9  | 11.7  |
|                                                               | Other                            | 5.87  | 5.99  |
| 7y Lacking household amenities                                | 1190 (12.8)                      | 17.0  | 16.9  |
| 33y educational attainment                                    | 1201 (12.9)                      |       |       |
|                                                               | None                             | 10.0  | 10.8  |
|                                                               | Some                             | 11.8  | 12.1  |
|                                                               | O-levels                         | 34.5  | 34.4  |
|                                                               | A-levels                         | 29.9  | 29.3  |
|                                                               | Degree                           | 13.9  | 13.5  |
| 7y household crowding                                         | 1448 (15.6)                      | 39.8  | 40.0  |
| 45y glyated haemoglobin (mmol/L) <sup>€</sup>                 | 1478 (15.9)                      | 165.1 | 165.2 |
| 45y Triglycerides (mmol/L) <sup>€</sup>                       | 1545 (16.6)                      | 52.6  | 52.9  |
| Birthweight (adjusted for gestational age) <sup>¥</sup>       | 1581 (17.0)                      | 0.03  | 0.02  |
| 45y low-density lipoprotein cholesterol (mmol/L) <sup>€</sup> | 1950 (21.0)                      | 120.1 | 120.9 |

\*averaged over 20 imputed datasets; <sup>€</sup>No missing data on these variables; <sup>ª</sup>classes I and II (professional/managerial), class III non-manual (skilled non-manual), class III manual (skilled manual) and classes IV and V (partly/unskilled manual); <sup>£</sup>glycated haemoglobin and all lipids are presented (and modelled in imputation models) as 100\*ln(x) (to ensure data is normally distributed); <sup>¥</sup>standardised scale

Table S6. Hazard ratios (95% confidence intervals) for early-life adversities in relation to all-cause mortality in 1958 birth cohort participants aged 44/45y to 58y

|                                     | Model 1          | Model 2          | Model 3         |
|-------------------------------------|------------------|------------------|-----------------|
|                                     | HR (95%CI)       | HR (95%CI)       | HR (95%CI)      |
| Imputed data (N=9310)               |                  |                  |                 |
| Socioeconomic disadvantage          | 2.22(1.68,2.94)  | 2.12(1.60,2.82)  | 1.93(1.45,2.58) |
| Neglect                             | 1.71(1.26,2.33)  | 1.49(1.08,2.07)  | 1.43(1.03,1.98) |
| Physical abuse                      | 2.35(1.69, 3.27) | 2.15(1.54,3.02)  | 1.73(1.11,2.71) |
| Psychological abuse                 | 1.64(1.21,2.22)  | 1.55(1.14,2.10)  | 0.99(0.66,1.47) |
| Witnessing abuse                    | 1.94(1.35,2.79)  | 1.81(1.26,2.62)  | 1.15(0.73,1.80) |
| Sexual abuse                        | 4.12(2.51,6.77)  | 3.60(2.18,5.96)  | 2.64(1.52,4.59) |
| Complete case analysis <sup>a</sup> |                  |                  |                 |
| Socioeconomic disadvantage          | 2.22(1.68,2.94)  | 1.99(1.41,2.82)  | 1.78(1.25,2.54) |
| Neglect                             | 1.72(1.27,2.34)  | 1.72(1.16,2.56)  | 1.68(1.13,2.50) |
| Physical abuse                      | 2.35(1.69, 3.27) | 2.40(1.59,3.64)  | 1.53(0.88,2.67) |
| Psychological abuse                 | 1.64(1.21,2.22)  | 1.81(1.26,2.61)  | 1.08(0.67,1.75) |
| Witnessing abuse                    | 1.94(1.35,2.79)  | 2.51(1.64,3.84)  | 1.56(0.92,2.62) |
| Sexual abuse                        | 4.12(2.51,6.77)  | 5.64(3.10,10.26) | 3.70(1.90,7.19) |

<sup>a</sup>N varies from 8460 (neglect) to 9310 (psychological abuse) in Model 1 and 6645 (CMs) to 6922 (socioeconomic disadvantage) in Model 3 due to missing data. Adjustments as in Figure 1 footnotes.



Table S7. Hazard ratios (95% confidence intervals) for early-life adversities and risk of premature death (44/45y to 58y) adjusted separately for potential intermediaries<sup>a</sup> (N=9310).

|                                           | Socioeconomic disadvantage | Neglect          | Physical abuse   | Sexual abuse     |
|-------------------------------------------|----------------------------|------------------|------------------|------------------|
| Model 3 <sup>b</sup>                      | 1.96(1.47,2.61)            | 1.45 (1.04,2.03) | 1.72(1.10, 2.70) | 2.60(1.49, 4.52) |
| <b>Socioeconomic</b>                      |                            |                  |                  |                  |
| + 33y social class                        | 1.89(1.42,2.53)            | 1.37(0.98,1.91)  | 1.74(1.11,2.73)  | 2.57(1.48,4.48)  |
| + 33y educational qualifications          | 1.82(1.36, 2.43)           | 1.29(0.92,1.80)  | 1.74(1.11,2.72)  | 2.56(1.48,4.45)  |
| <b>Behavioural</b>                        |                            |                  |                  |                  |
| + 42y smoking,                            | 1.75(1.31,2.34)            | 1.29(0.93,1.80)  | 1.57(1.00,2.45)  | 2.33(1.34,4.05)  |
| +45y problem drinking                     | 1.91(1.42,2.55)            | 1.45(1.04,2.01)  | 1.69(1.08,2.63)  | 2.78(1.60,4.83)  |
| +42y illegal drug use                     | 1.92(1.44, 2.57)           | 1.43(1.03,1.98)  | 1.68(1.07,2.62)  | 2.61(1.50,4.55)  |
| <b>Adiposity</b>                          |                            |                  |                  |                  |
| + 45y obesity                             | 1.92(1.44,2.56)            | 1.42(1.02, 1.97) | 1.72(1.10,2.69)  | 2.63(1.51,4.58)  |
| + 45y waist-hip ratio                     | 1.89(1.42,2.53)            | 1.39(1.00,1.92)  | 1.75(1.12,2.73)  | 2.73(1.57,4.76)  |
| <b>Mental Health</b>                      |                            |                  |                  |                  |
| +42y psychological distress               | 1.91(1.43,2.55)            | 1.37(0.98,1.91)  | 1.70(1.09,2.64)  | 2.54(1.46, 4.42) |
| <b>Cardio-metabolic factors</b>           |                            |                  |                  |                  |
| + 45y glycated haemoglobin                | 1.89(1.41,2.52)            | 1.39 (1.00,1.93) | 1.65(1.05, 2.58) | 2.72(1.57, 4.73) |
| + 45y triglycerides                       | 1.92(1.44,2.57)            | 1.42(1.02,1.96)  | 1.72(1.10, 2.70) | 2.67(1.53, 4.64) |
| + 45y low-density lipoprotein cholesterol | 1.93(1.45,2.58)            | 1.43 (1.03,1.98) | 1.72(1.10, 2.69) | 2.61(1.50, 4.54) |

<sup>a</sup> For each pathway, models were adjusted for factors separately (not simultaneously). See text and Table S1 for details on intermediary factors.

<sup>b</sup> Model 3 (adjustments shown in Figure 1 footnotes)

Table S8: Hazard ratios (95% confidence intervals) for childhood socioeconomic disadvantage and neglect in relation to all-cause mortality in 1958 birth cohort participants aged 11y to 58y (N=15,092).

|                            | Model 1 HR (95%CI) | Model 2 HR (95%CI) |
|----------------------------|--------------------|--------------------|
| Socioeconomic disadvantage | 1.65(1.40,1.94)    | 1.55(1.31,1.83)    |
| Neglect                    | 1.72(1.46,2.01)    | 1.46(1.23,1.73)    |

Adjustments as in Figure 1 footnotes.

Table S9. Hazard ratios (95% confidence intervals) for distinct non-overlapping early-life adversities (versus none) in relation to all-cause mortality in 1958 birth cohort participants aged 44/45y to 58y.

| Early Life adversities vs       | N <sup>a</sup> (%) | Model 1          | Model 2           |
|---------------------------------|--------------------|------------------|-------------------|
| no Early life adversities       |                    | HR (95%CI)       | HR (95%CI)        |
| No Early life adversities       | 5968 (78.5)        | ref              | ref               |
| Socioeconomic disadvantage only | 544 (7.16)         | 2.34(1.63,3.37)  | 2.30(1.59, 3.32)  |
| Neglect <sup>b</sup> only       | 522 (7.26)         | 2.11(1.44,3.08)  | 2.01(1.34, 3.02)  |
| Physical abuse only             | 66 (0.87)          | 1.73(0.60, 5.02) | 1.66(0.57, 4.83)  |
| Psychological abuse only        | 342 (4.50)         | 1.16(0.63,2.13)  | 1.17(0.63,2.15)   |
| Witnessing abuse only           | 108 (1.42)         | 0.66(0.16,2.66)  | 0.65(0.16, 2.61)  |
| Sexual abuse only               | 23 (0.30)          | 3.62(0.90,14.6)  | 3.70 (0.91, 15.0) |

<sup>a</sup> N varies due to missing data; <sup>b</sup> Those with complete data on 6 or more of 11 neglect items; Adjustments as in Figure 1 footnotes.
